# Supplementary material
Source: PubMed Central journal article supplement (PMC3391703)
Supplement: NIHMS320907-supplement-1.pdf [file NIHMS320907-supplement-1.pdf]

# **RNA interference promotes heterochromatic silencing through replication-coupled release of RNA polymerase II**

Mikel Zaratiegui, Stephane Castel, Danielle V. Irvine, Anna Kloc, Jie Ren, Fei Li, Elisa de Castro, Laura Marín, Ann-Yun Chang, Derek Goto, W. Zacheus Cande, Francisco Antequera, Benoit Arcangioli, Rob Martienssen.

## **Supplementary Information**

## Supplementary Data

### Genetic interactions between dcr1 and replication fork protection factors

|              | dcr1                      | mrc1                      |
|--------------|---------------------------|---------------------------|
| dcr1         | N/A                       | -11.8                     |
| mrc1         | -11.8                     | N/A                       |
| ptn1         | -3.5                      | -7.5                      |
| tub1         | -10.3                     | -3.6                      |
| mcl1         | -12.3                     | -8.6                      |
| ask1         | -3.5                      | -8.7                      |
| hos2         | -4.3                      | -5.9                      |
| spc34        | -3.5                      | -2.9                      |
| pob3         | -6.1                      | -7.4                      |
| hip1         | -5.9                      | -6.8                      |
| clr3         | -2.7                      | -3.0                      |
| mug154       | -2.9                      | -3.8                      |
| fft3         | -3.7                      | -3.4                      |
| swi3         | -3.5                      | -4.1                      |
| SPBC29A3.13  | -4.0                      | -5.3                      |
| SPAC16C9.05  | -2.8                      | -6.5                      |
| SPAC664.02c  | -3.9                      | -2.6                      |
| SPBP8B7.10c  | -3.7                      | -2.7                      |
| SPBC26H8.05c | -4.5                      | -2.6                      |
| clr4         | 5.9                       | -16.6                     |
| clr7/dos2    | 4.8                       | -16.1                     |
| clr8/dos1    | 5.1                       | -16.7                     |
| klp6         | 4.2                       | -4.6                      |
| ago1         | Suppression <sup>35</sup> | -13.3                     |
| chp1         | 2.6                       | -8.6                      |
| tas3         | 5.1                       | -14.7                     |
| ers1         | 3.1                       | -7.1                      |
| swi6         | 2.4                       | -10.2                     |
| nto1         | 2.9                       | -15.1                     |
| SPBC13E7.08c | 2.1                       | -5.4                      |
| rad26        | -2.5                      | Suppression <sup>36</sup> |

**Supplemental Table S1. Interactions between RNA interference, DNA replication and DNA repair in *S.pombe* and in higher eukaryotes.** Double mutants between strains from a genome-wide deletion library and *dcr1Δ*, or *mrc1Δ* (mediator of replication checkpoint), were assessed for growth relative to single mutants<sup>37</sup>. Positive Z-scores represent phenotypic suppression, while negative scores represent phenotypic enhancement, and genetic interaction. Z-scores above 1.9 are significant (P<0.05). Note that there is also a strong negative interaction between *rhp51* and *dcr1*, as well as *rhp51* and *ago1* (Fig. 2d). In *Neurospora*<sup>38</sup> RNAi is induced by HU, as it is in *S. pombe*<sup>2</sup> while in Arabidopsis, mutants in DNA replication and repair, including DNA polymerase Polε lose heterochromatic silencing from transgenes silenced by RNAi, and stimulate recombination<sup>39</sup>. In *Drosophila*, mutations in RNAi are suppressed by replication checkpoint mutants<sup>40</sup>, while *dcr-2* mutants have an increased DNA damage response in replicating heterochromatin<sup>41</sup>.

Supplemental Figure 1

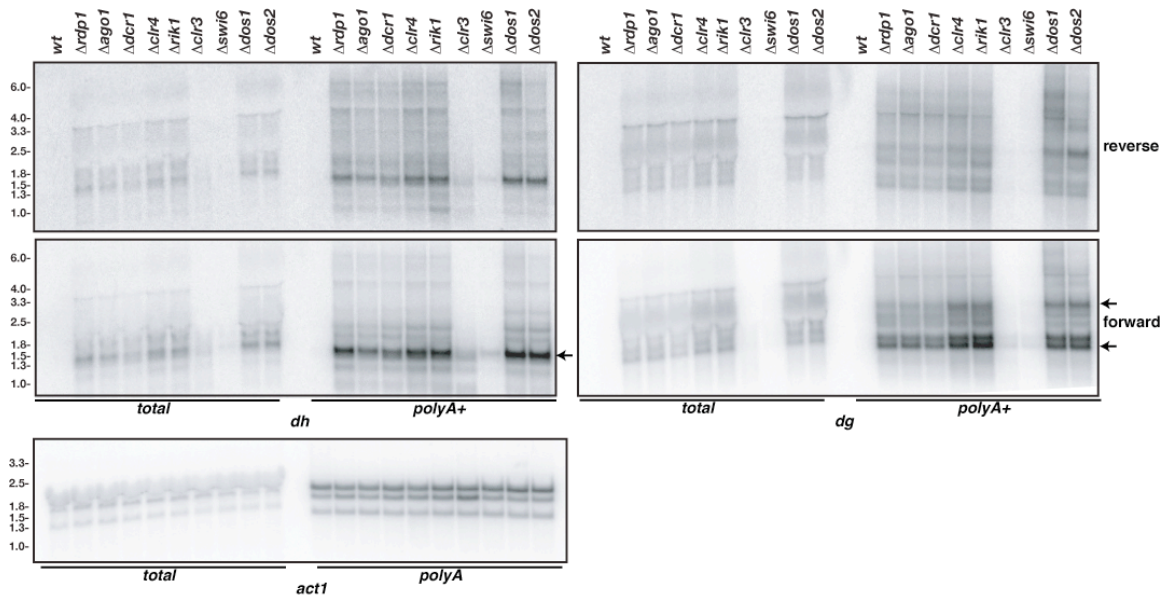

**Figure S1.** Northern blot analysis of RNA from wild-type and mutant strains. Transcripts corresponding to near full length cDNA clones are indicated by arrows. Blots were reprobbed with *act1* as loading control.

Supplemental Figure 2

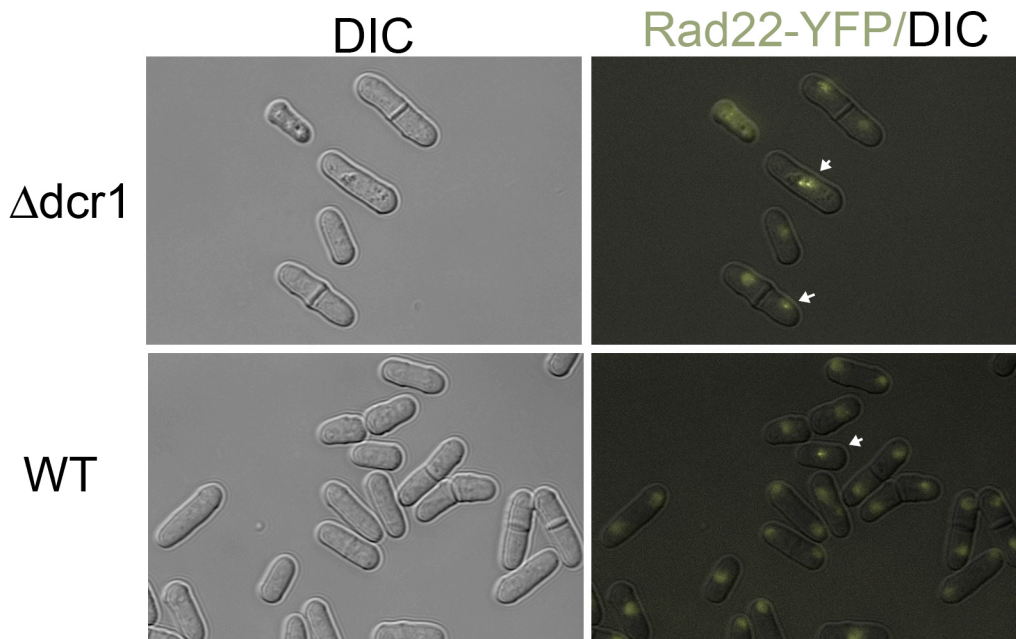

|                         | WT    | $\Delta dcr1$ |
|-------------------------|-------|---------------|
| Total cells             | 13.2% | 22.7%         |
| S-early G2 cells        | 6.3%  | 34.2%         |
| Late G2 cells (1 focus) | 18.0% | 10.6%         |
| Late G2 cells (>1 foci) | 0.6%  | 7.1%          |

**Figure S2.** RNAi protects from spontaneous DNA damage. Rad22 foci were scored under fluorescence microscopy in unsynchronized cells, which were assessed for cell cycle stage by Differential Interference Contrast (DIC). S phase (binucleate septated cells) could be readily distinguished from G2 (mono-nuclear cells). Double foci in *dcr1* $\Delta$  cells (n=132), and single foci in WT cells (n=273) are shown, along with a table of results.

Supplementary Figure 3.

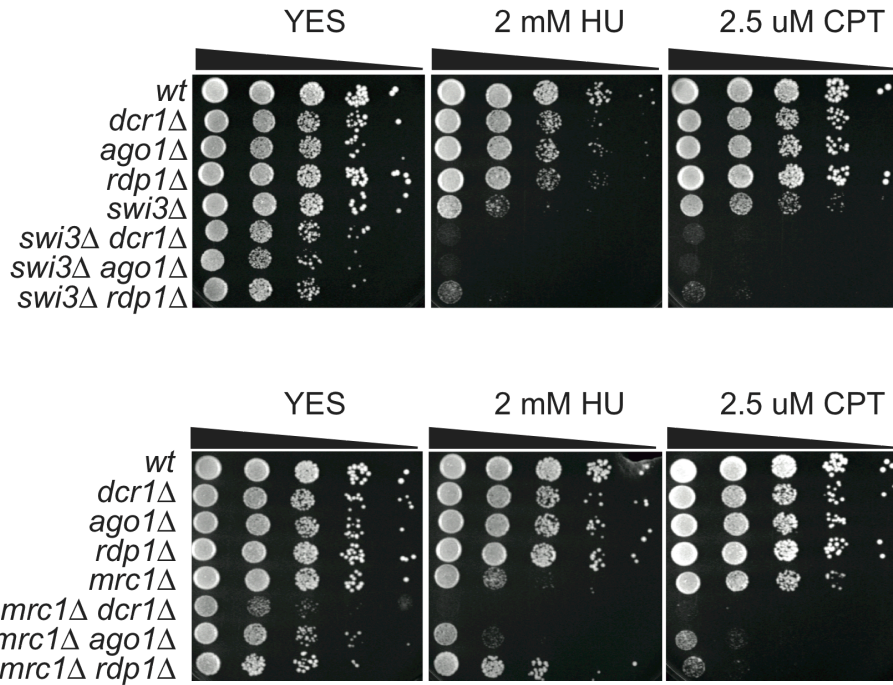

**Figure S3.** Replication fork protection is essential in the absence of RNAi. Mutant and WT cells were diluted 1:10, plated on 2mM HU, or 2.5μM CPT and analyzed for growth defects. WT and RNAi mutant cells grow normally at these concentrations, but double mutants with *swi3Δ* and *mrc1Δ* do not. Swi3 and Mrc1 are components of the replication fork protection complex.

Supplemental Figure 4.

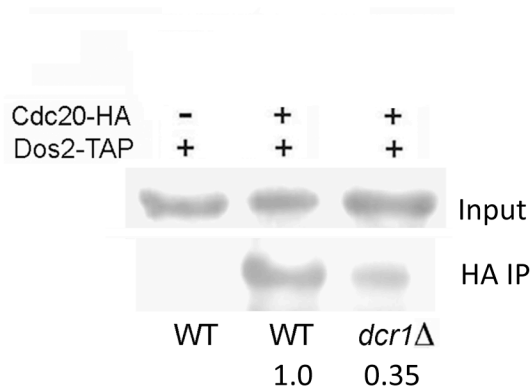

**Figure S4.** Interaction between DNA polymerase  $\epsilon$  and Rik1/CLRC depends on RNAi. Immunoprecipitation from whole cell extracts was performed using antibodies against DNA polymerase Pole (Cdc20-HA), and Westerns were immunoblotted using antibodies against Dos2-TAP tagged protein. Strong interaction in WT cells was reduced in *dcr1Δ* (35-39% in 3 replicates). *cdc20-p7* mutants lacking the Dos2-interacting domain lose heterochromatic histone methylation<sup>3</sup> and are hypersensitive to DNA damage<sup>42</sup>. This Dos2-interacting domain of Pole<sup>3</sup> also interacts with Mrc1<sup>43</sup>, so that loss of Dos2 interaction could account for enhanced requirement for Mrc1 in *dcr1Δ* cells (Supplemental Fig. 2).

Supplemental Figure 5

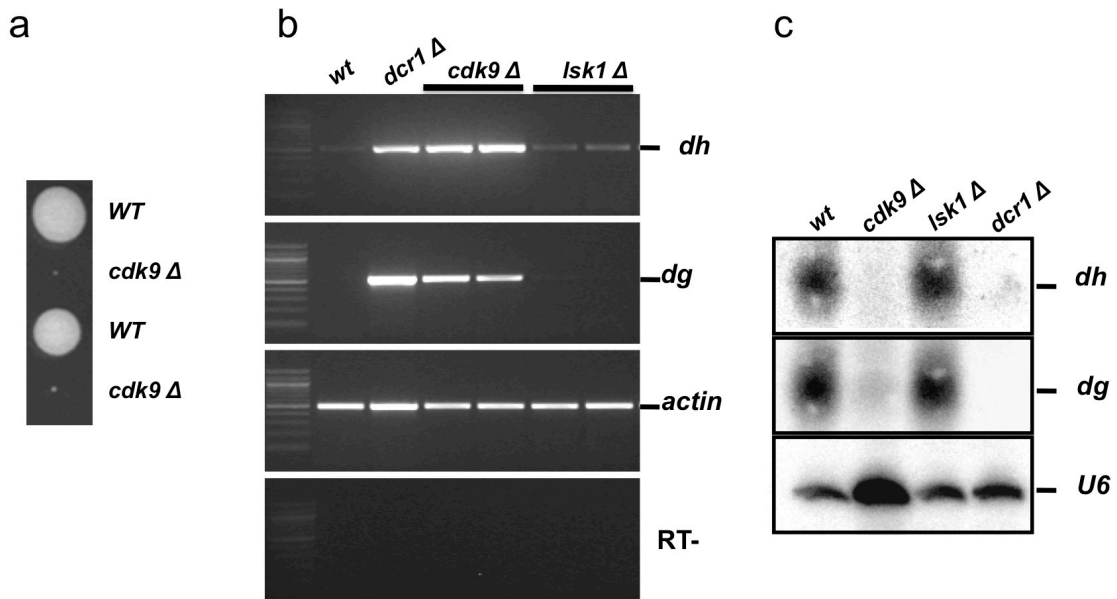

**Figure S5.** Cdk9, but not the RNA PolIII CTD kinase Lsk1, is necessary for sRNA production and pericentric repeat silencing. a. A segregating tetrad dissected from a sporulating *cdk9::Hyg<sup>r</sup>/cdk9<sup>+</sup>* diploid, growing in rich media. b. RT-PCR of pericentric sRNA precursors in *dcr1*, *cdk9* and *lsk1* KO mutants. c. sRNA northern blot in *dcr1*, *cdk9* and *lsk1* KO mutants.



**Table S2.** Strains used in this work.

| <b>Strain name</b> | <b>Genotype</b>                                                                                                                                | <b>Reference</b> |
|--------------------|------------------------------------------------------------------------------------------------------------------------------------------------|------------------|
| DG21               | <i>h-</i> , <i>otr1R(SphI)::ura4+</i> , <i>ura4-DS/E</i> , <i>leu1-32</i> , <i>ade6-216</i> , <i>his7-366</i>                                  | 44               |
| DG690              | <i>h-</i> , <i>delta-dcr1::kanMX6</i> , <i>otr1R(SphI)::ura4+</i> , <i>ura4-DS/E</i> , <i>leu1-32</i> , <i>ade6-210</i> , <i>his7-366</i>      | 45               |
| DG124              | <i>h-</i> , <i>delta-rdp1::kanMX6</i> , <i>otr1R(SphI)::ura4+</i> , <i>ura4-DS/E</i> , <i>leu1-32</i> , <i>ade6-216</i> , <i>his7-366</i>      | this study       |
| ZB20               | <i>h-</i> , <i>delta-ago1::kanMX6</i> , <i>otr1R(SphI)::ura4+</i> , <i>ura4-DS/E</i> , <i>leu1-32</i> , <i>ade6-216</i> , <i>his7-366</i>      | this study       |
| DG760              | <i>h-</i> , <i>delta-clr4::kanMX6</i> , <i>otr1R(SphI)::ura4+</i> , <i>ura4-DS/E</i> , <i>leu1-32</i> , <i>ade6-216</i> , <i>his7-366</i>      | this study       |
| DG763              | <i>h-</i> , <i>delta-rik1::kanMX6</i> , <i>otr1R(SphI)::ura4+</i> , <i>ura4-DS/E</i> , <i>leu1-32</i> , <i>ade6-210</i> , <i>his7-366</i>      | this study       |
| DG784              | <i>h-</i> , <i>delta-clr3::kanMX6</i> , <i>otr1R(SphI)::ura4+</i> , <i>ura4-DS/E</i> , <i>leu1-32</i> , <i>ade6-216</i> , <i>his7-366</i>      | this study       |
| DG756              | <i>h-</i> , <i>delta-swi6::kanMX6</i> , <i>otr1R(SphI)::ura4+</i> , <i>ura4-DS/E</i> , <i>leu1-32</i> , <i>ade6-216</i> , <i>his7-366</i>      | this study       |
| FL70               | <i>h-</i> , <i>delta-dos1::kanMX6</i> , <i>ura4-D18</i> , <i>leu1-32</i> , <i>ade6-210</i> , <i>his3-D1</i>                                    | 44               |
| FL71               | <i>h-</i> , <i>delta-dos2::kanMX6</i> , <i>ura4-D18</i> , <i>leu1-32</i> , <i>ade6-210</i> , <i>his3-D1</i>                                    | 44               |
| ZB515              | <i>h-</i> , <i>rad22-YFP::kanMX6</i> , <i>ade6+</i>                                                                                            | 46               |
| AK69               | <i>rad22-YFP::kanMX6</i> , <i>delta-dcr1::kanMX6</i> , <i>ade6-M210</i>                                                                        | this study       |
| BG_3416H           | <i>h+</i> , <i>delta-swi3::kanMX</i> , <i>ade6-210</i>                                                                                         | Bioneer library  |
| AK68               | <i>h-</i> , <i>delta-dcr1::kanMX6</i> , <i>delta-swi3::kanMX6</i> , <i>ade6-216</i>                                                            | this study       |
| DI394              | <i>delta-ago1::kanMX6</i> , <i>delta-swi3::kanMX6</i> , <i>ade6-216</i>                                                                        | this study       |
| DI396              | <i>delta-rdp1::kanMX6</i> , <i>delta-swi3::kanMX6</i> , <i>ade6-216</i>                                                                        | this study       |
| BG_1948H           | <i>h+</i> , <i>delta-mrc1::kanMX</i> , <i>ade6-210</i>                                                                                         | Bioneer library  |
| DI408              | <i>h+</i> , <i>delta-mrc1::kanMX</i> , <i>delta-dcr1::kanMX6</i>                                                                               | this study       |
| DI412              | <i>delta-mrc1::kanMX</i> , <i>delta-ago1::kanMX6</i>                                                                                           | this study       |
| DI417              | <i>h+</i> , <i>delta-mrc1::kanMX</i> , <i>delta-ago1::kanMX6</i> , <i>ade6-216</i>                                                             | this study       |
| FL393              | <i>h<sup>90</sup></i> , <i>cdc20-GFP-HA::kanMX6</i> , <i>dos2-TAP::ura4+</i> , <i>ura4-D18</i> , <i>ade6-216</i> , <i>leu1-32</i>              | this study       |
| FL400              | <i>h-</i> , <i>dos2-TAP::ura4+</i> , <i>ura4-D18</i> , <i>ade6-216</i> , <i>leu1-32</i>                                                        | this study       |
| FL421              | <i>h-</i> , <i>cdc20-GFP-HA::kanMX6</i> , <i>dos2-TAP::ura4+</i> , <i>delta-dcr1::kanMX6</i> , <i>ura4-</i> , <i>ade6-216</i> , <i>leu1-32</i> | this study       |
| ZB580              | <i>h+</i> , <i>delta-mms19::kanMX6</i> , <i>otr1R(SphI)::ura4+</i> , <i>ura4-DS/E</i> , <i>leu1-32</i> , <i>ade6-216</i> , <i>his7-366</i>     | this study       |
| FY14135            | <i>h+</i> , <i>h+</i> <i>ade6-M210 leu1-32 ura4-D18 rhp51::ura4+</i>                                                                           | NBRP, Japan      |
| AY337              | <i>h+</i> , <i>cdk9::hyg</i> , <i>otr1R (sph1)::ura4</i> , <i>ura4 DS/E</i> , <i>ade6 216</i> , <i>leu1-32</i>                                 | this study       |
| AY453              | <i>Isk1::KanMX6</i> , <i>leu1-32</i>                                                                                                           | this study       |
| PB178              | <i>M smt-0</i> , <i>rhp51::his3</i> , <i>his3-D1</i>                                                                                           | this study       |

**Table S3.** Oligonucleotides used in this study.

|              |                                                |
|--------------|------------------------------------------------|
| p30F_T7      | TAATACGACTCACTATAGGGAGcctggtgattcggcaccttg     |
| p30R_T3      | AATTAACCCTCACTAAAGGGAGAtggagaacgactgtgaagagacc |
| p33F_T7      | TAATACGACTCACTATAGGGAGtgcaagtggaaagtggttca     |
| p33R_T3      | AATTAACCCTCACTAAAGGGAGAtcgaccaccctgacttgttctc  |
| act1F        | TACCCCATGAGCACGGTAT                            |
| act1R_T7     | TAATACGACTCACTATAGGGAGAGGAGGAAGATTGAGCAGCAG    |
| p30qPCR_F    | CCATATCAATTTCCCATGTTCC                         |
| p30qPCR_R    | CATCAAGCGAGTCGAGATGA                           |
| p33qPCR_F    | TATCCTGCGTCTCGGTATCC                           |
| p33qPCR_R    | CTGTTTCGTGAATGCTGAGAAAG                        |
| p20F         | CCGGCGATTGAGAAAGACTACAA                        |
| p20R         | TCGAAAAGATACGGCCAATAACA                        |
| act1qPCR_F   | TGCACCTGCCTTTTATGTTG                           |
| act1qPCR_R   | TGGGAACAGTGTGGGTAACA                           |
| dgIIIrevPolC | CGGCAACTCTGGTCCGATTTA                          |
| dgIIIrevPolD | TCTCACATAACCGTTGCATTCATT                       |
| dgIIIforPolC | CACAATGAAAACCGATATGTGG                         |
| dhIforPolA   | TGCTGAGGTAGATGCGTTGTTCA                        |
| dhIrevPolA   | TGCCGAATCAACAGGCCATA                           |
| ura4DS/EF    | GCCTCAAAGAAGTTGGTTTACC                         |
| ura4DS/ER    | CGCTACCGCAGTTTACAATC                           |

**Table S4.** Sequencing statistics for PolII ChIP-Seq

| Strain       | Treatment | IP | # Reads  | % Aligned | # Aligned Reads |
|--------------|-----------|----|----------|-----------|-----------------|
| <i>dg21</i>  | Exp       | S2 | 1.07E+07 | 82.14     | 8.77E+06        |
| <i>dg21</i>  | Exp       | S5 | 7.69E+06 | 88.77     | 6.82E+06        |
| <i>dg690</i> | Exp       | S2 | 2.85E+06 | 87.35     | 2.49E+06        |
| <i>dg690</i> | Exp       | S5 | 4.03E+06 | 87.94     | 3.55E+06        |
| <i>dg21</i>  | HU        | S2 | 1.01E+07 | 81.53     | 8.22E+06        |
| <i>dg21</i>  | HU        | S5 | 6.78E+06 | 85.86     | 5.82E+06        |
| <i>dg690</i> | HU        | S2 | 3.18E+06 | 86.75     | 2.76E+06        |
| <i>dg690</i> | HU        | S5 | 2.36E+06 | 87.29     | 2.06E+06        |

## References

- 35 Carmichael JB, Provost P, Ekwall K, Hobman TC. ago1 and dcr1, two core components of the RNA interference pathway, functionally diverge from rdp1 in regulating cell cycle events in *Schizosaccharomyces pombe*. *Mol Biol Cell*. Mar;15(3):1425-35 (2004)
- 36 Tanaka K, Russell P. Cds1 phosphorylation by Rad3-Rad26 kinase is mediated by forkhead-associated domain interaction with Mrc1. *J. Biol. Chem.* Jul 279(31);32079-86 (2004)
- 37 Roguev A. et al. Conservation and rewiring of functional modules revealed by an epistasis map in fission yeast. *Science* 322, 405-10 (2008).
- 38 Lee, H. C. et al. qiRNA is a new type of small interfering RNA induced by DNA damage. *Nature* **459**, 274-277, (2009).
- 39 Yin, H. et al. Epigenetic regulation, somatic homologous recombination, and abscisic acid signaling are influenced by DNA polymerase epsilon mutation in *Arabidopsis*. *Plant Cell* **21**, 386-402, (2009)
- 40 Klattenhoff, C. et al. *Drosophila* rasiRNA pathway mutations disrupt embryonic axis specification through activation of an ATR/Chk2 DNA damage response. *Dev Cell* **12**, 45-55, (2007).
- 41 Peng, J. C. & Karpen, G. H. Heterochromatic genome stability requires regulators of histone H3 K9 methylation. *PLoS Genet* **5**, (2009).
- 42 Feng, W. & D'Urso, G. *Schizosaccharomyces pombe* cells lacking the amino-terminal catalytic domains of DNA polymerase epsilon are viable but require the DNA damage checkpoint control. *Mol Cell Biol* **21**, 4495-4504, (2001).
- 43 Yin, L., Locovei, A. M. & D'Urso, G. Activation of the DNA damage checkpoint in mutants defective in DNA replication initiation. *Mol Biol Cell* **19**, 4374-4382 (2008).
- 44 Li F., Goto D.B., Zaratiegui M., Tang X., Martienssen R., Cande W.Z.. Two novel proteins, dos1 and dos2, interact with rik1 to regulate heterochromatic RNA interference and histone modification. *Curr Biol*. 23;15(16):1448-57 (2005)
- 45 Irvine D.V. et al.. Mapping epigenetic mutations in fission yeast using whole-genome next-generation sequencing. *Genome Res*. 19(6):1077-83. (2009)
- 46 Meister P., Poidevin M., Francesconi S., Tratner I., Zarzov P., Baldacci G. Nuclear factories for signalling and repairing DNA double strand breaks in living fission yeast. *Nucleic Acids Res*. 2003 Sep 1;31(17):5064-73.
